# Supplementary material
Source: ML conference proceedings conference paper supplement (https://proceedings.neurips.cc/paper_files/paper/2014/hash/3fab5890d8113d0b5a4178201dc842ad-Abstract.html)
Supplement: Supplementary file [file 3fab5890d8113d0b5a4178201dc842ad-Supplemental.zip]

## Appendix: Beta-Negative Binomial Process and Exchangeable Random Partitions for Mixed-Membership Modeling

### Logbeta Process

Denoting a transformed representation of the beta process as  $Q = -\sum_{k=1}^{\infty} \ln(1-p_k)\delta_{\omega_k}$ , then for each  $A \subset \Omega$ , using the Lévy-Khintchine theorem and (1), the Laplace transform of the random variable  $Q(A) = -\sum_{k:\omega_k \in A} \ln(1-p_k)$  can be expressed as

$$\mathbb{E}[e^{-sQ(A)}] = \exp \left\{ \int_{[0,1] \times A} [(1-p)^s - 1] \nu(dp d\omega) \right\} = \exp \left\{ -B_0(A) [\psi(c+s) - \psi(c)] \right\},$$

where  $\psi(x) = \frac{\Gamma'(x)}{\Gamma(x)}$  is the digamma function with  $\psi(c+s) - \psi(c) = \sum_{i=0}^{\infty} \left( \frac{1}{c+i} - \frac{1}{c+i+s} \right)$ . Thus  $Q(A)$  is an infinitely divisible random variable, which is defined as the logbeta random variable as  $Q(A) \sim \text{logBeta}(B_0(A), c)$ . We further define the associated completely random measure as the logbeta process  $Q \sim \text{logBP}(B_0, c)$ , with Lévy measure  $\nu(dq d\omega) = \frac{e^{-qc}}{1-e^{-q}} dq B_0(d\omega)$ . The logbeta random variable is found to be useful to derive closed-form Gibbs sampling update equations for model parameters, as shown below. We mention that the logbeta process presented here is the same as the beta-stacy process of [1].

### Proof for Lemma 2

By separating the atoms within the absolutely continuous space and the atoms with positive counts, the conditional likelihood of the BNP group size dependent mixed-membership model, as shown in (5), can be rewritten as

$$f(\mathbf{z}, \mathbf{m} | \mathbf{r}, B) = \frac{1}{\prod_{j=1}^J m_j!} \left\{ \prod_{k:n_{\cdot,k}=0} (1-p_k)^{r_{\cdot}} \right\} \cdot \left\{ \prod_{k:n_{\cdot,k}>0} p_k^{n_{\cdot,k}} (1-p_k)^{r_{\cdot}} \prod_{j=1}^J \frac{\Gamma(n_{jk}+r_j)}{\Gamma(r_j)} \right\}.$$

Let  $\mathcal{D}_J := \{\omega_k\}_{k:n_{\cdot,k}>0}$  denote the set of all observed atoms with positive counts, and let  $K_J := |\mathcal{D}_J|$  denote its cardinality. Our goal is to marginalize out the beta process  $B$  to obtain the joint distribution of the cluster assignments  $\mathbf{z}$  and the group-size vector  $\mathbf{m}$ . Fixing an arbitrary labeling of the atoms in  $\mathcal{D}_J$  from 1 to  $K_J$ , we may further rewrite the joint conditional likelihood as

$$f(\mathbf{z}, \mathbf{m} | \mathbf{r}, B) = \frac{1}{\prod_{j=1}^J m_j!} e^{-Q(\Omega \setminus \mathcal{D}_J)r_{\cdot}} \prod_{k=1}^{K_J} \left[ p_k^{n_{\cdot,k}} (1-p_k)^{r_{\cdot}} \prod_{j=1}^J \frac{\Gamma(n_{jk}+r_j)}{\Gamma(r_j)} \right], \quad (15)$$

where  $Q(\Omega \setminus \mathcal{D}_J) := -\sum_{k:n_{\cdot,k}=0} \ln(1-p_k)$  follows the  $\text{logBeta}(\gamma_0, c)$  distribution in the prior. Since  $\int_{[0,1] \times \Omega} p^n (1-p)^r \nu(dp d\omega) = \gamma_0 \frac{\Gamma(n)\Gamma(c+r)}{\Gamma(c+n+r)}$  and  $\mathbb{E}_B[e^{-Q(\Omega \setminus \mathcal{D}_J)r_{\cdot}}] = e^{-\gamma_0[\psi(c+r_{\cdot}) - \psi(c)]}$ , we may marginalize  $B$  out of (15) with the Palm formula [2, 3, 4], leading to (6), which is a PMF that is only related to the cluster sizes, regardless of their orders. Since the group sizes  $\{m_j\}_j$  themselves are random, and the random cluster sizes  $\{n_{jk}\}_k$  are exchangeable, we call (6) as the exchangeable cluster probability function (ECPF) of the BNP group size dependent mixed-membership model.  $\square$

### Proof for Lemma 3

As the group-size count vector  $\mathbf{m} = (m_1, \dots, m_J)^T$  can be generated as the summation of a Poisson random number of i.i.d. random count vectors, its PMF can be expressed as

$$\begin{aligned} f(\mathbf{m} | \mathbf{r}, \gamma_0, c) &= \sum_{K=1}^{m_{\cdot}} \text{Pois}\{K; \gamma_0 [\psi(c+r_{\cdot}) - \psi(c)]\} \sum_{\sum_{k=1}^K n_{\cdot,k} = \mathbf{m}} \prod_{k=1}^K \text{DirMult}(\mathbf{n}_{\cdot,k} | n_{\cdot,k}, \mathbf{r}) \text{Digam}(n_{\cdot,k} | r_{\cdot}, c) \\ &= \sum_{K=1}^{m_{\cdot}} \frac{\gamma_0^K e^{-\gamma_0[\psi(c+r_{\cdot}) - \psi(c)]}}{K!} \sum_{\sum_{k=1}^K n_{\cdot,k} = \mathbf{m}} \prod_{k=1}^K \frac{\Gamma(n_{\cdot,k}) \Gamma(c+r_{\cdot})}{\Gamma(c+n_{\cdot,k}+r_{\cdot})} \prod_{j=1}^J \frac{\Gamma(n_{jk}+r_j)}{n_{jk}! \Gamma(r_j)}. \end{aligned}$$

Using the ECPF in (6) and the multivariate distribution of the group size vector  $\mathbf{m}$  shown above, the EPPF in (9) directly follows Bayes' rule as

$$f(\mathbf{z} | \mathbf{m}, \mathbf{r}, \gamma_0, c) = \frac{f(\mathbf{z}, \mathbf{m} | \mathbf{r}, \gamma_0, c)}{f(\mathbf{m} | \mathbf{r}, \gamma_0, c)}.$$

$\square$

#### Proof for Lemma 4

One may rewrite the ECPF in (6) as

$$f(z_{ji}, \mathbf{z}^{-ji}, \mathbf{m} | \mathbf{r}, \gamma_0, c) = \frac{1}{\prod_{j=1}^J m_j!} \gamma_0^{K_J^{-ji}} e^{-\gamma_0[\psi(c+r.) - \psi(c)]} \left( \frac{\gamma_0 r_j}{c+r.} \right)^{\delta_{(K_J^{-ji}+1)}(z_{ji})} \\ \times \prod_{k=1}^{K_J^{-ji}} \left[ \frac{\Gamma(n_{.k}^{-ji} + \delta_k(z_{ji})) \Gamma(c+r.)}{\Gamma(c + n_{.k}^{-ji} + \delta_k(z_{ji}) + r.)} \prod_j \frac{\Gamma(n_{jk}^{-ji} + \delta_k(z_{ji}) + r_j)}{\Gamma(r_j)} \right],$$

which directly leads to (10) via Bayes' rule as

$$P(z_{ji} | \mathbf{z}^{-ji}, \mathbf{m}, \mathbf{r}, \gamma_0, c) = \frac{f(z_{ji}, \mathbf{z}^{-ji}, \mathbf{m} | \mathbf{r}, \gamma_0, c)}{\sum_{k=1}^{K_J^{-ji}+1} f(z_{ji} = k, \mathbf{z}^{-ji}, \mathbf{m} | \mathbf{r}, \gamma_0, c)}.$$

□

#### Parameter Inference

Using both the conditional likelihood (5) and marginal likelihood (6), with the data augmentation and marginalization techniques for the negative binomial distribution in [5, 6], we sample the model parameters as

$$(\gamma_0 | -) \sim \text{Gamma} \left( e_0 + K_J, \frac{1}{f_0 + \psi(c+r.) - \psi(c)} \right), \quad (16)$$

$$(p_k | -) \sim \text{Beta}(n_{.k}, c+r.), \quad (Q(\Omega \setminus \mathcal{D}_J) | -) \sim \text{logBeta}(\gamma_0, c+r.), \quad (17)$$

$$(l_{jk} | -) = \sum_{t=1}^{n_{jk}} u_t, \quad u_t \sim \text{Bernoulli} \left( \frac{r_j}{r_j + t - 1} \right), \quad (18)$$

$$(r_j | -) \sim \text{Gamma} \left( a_0 + \sum_{k=1}^{K_J} l_{jk}, \frac{1}{b_0 + Q(\Omega \setminus \mathcal{D}_J) - \sum_{k=1}^{K_J} \ln(1 - p_k)} \right). \quad (19)$$

To draw from the logBeta distribution  $x \sim \text{logBeta}(\gamma_0, c+r.)$ , we use its Laplace transform

$$\mathbb{E}[e^{-sx}] = \exp \{ -\gamma_0 [\psi(c+r.+s) - \psi(c+r.)] \}$$

together with the random number generating technique developed in [7]. The only parameter that we could not find an analytic conditional posterior is the concentration parameter  $c$ , for which we use the griddy-Gibbs sampler [8] to sample from a discrete distribution

$$(c | -) \propto f(\mathbf{z}, \mathbf{m} | \mathbf{r}, \gamma_0, c) \quad (20)$$

over a grid of points  $\frac{1}{1+c} = 0.01, 0.02, \dots, 0.99$ . Collapsed Gibbs sampling for the BNP topic model is implemented by iteratively running (12) and (16)-(20). The direct assignment Gibbs sampler for the HDP-LDA is developed in [9] and also described in detail in [10].

#### References

- [1] S. G. Walker and P. Muliere. Beta-Stacy processes and a generalization of the Pólya-urn scheme. *Annals of Statistics*, 1997.
- [2] L. F. Lancelot. Poisson process partition calculus with applications to exchangeable models and Bayesian nonparametrics. *arXiv:0205093*, 2002.
- [3] J. Bertoin. *Random fragmentation and coagulation processes*, volume 102. Cambridge University Press, 2006.
- [4] F. Caron and Y. W. Teh. Bayesian nonparametric models for ranked data. In *NIPS*, 2012.
- [5] M. Zhou and L. Carin. Augment-and-conquer negative binomial processes. In *NIPS*, 2012.
- [6] M. Zhou and L. Carin. Negative binomial process count and mixture modeling. *To appear in IEEE Trans. Pattern Anal. Mach. Intelligence*, 2014.

- [7] M. S. Ridout. Generating random numbers from a distribution specified by its Laplace transform. *Statistics and Computing*, pages 439–450, 2009.
- [8] C. Ritter and M. A. Tanner. Facilitating the Gibbs sampler: the Gibbs stopper and the griddy-Gibbs sampler. *JASA*, 1992.
- [9] Y. W. Teh, M. I. Jordan, M. J. Beal, and D. M. Blei. Hierarchical Dirichlet processes. *JASA*, 2006.
- [10] E. B. Fox, E. B. Sudderth, M. I. Jordan, and A. S. Willsky. A sticky HDP-HMM with application to speaker diarization. *Annals of Applied Statistics*, 2011.
